# Supplementary material for: Discriminating between "Drizzle or rain" and sea salt aerosols in Cloudnet for measurements over the Barbados Cloud Observatory
Source: Copernicus journal article supplement (doi:10.5194/egusphere-2024-894), 2024-06-11

Particle lin. depol. ratio  
at 355nm

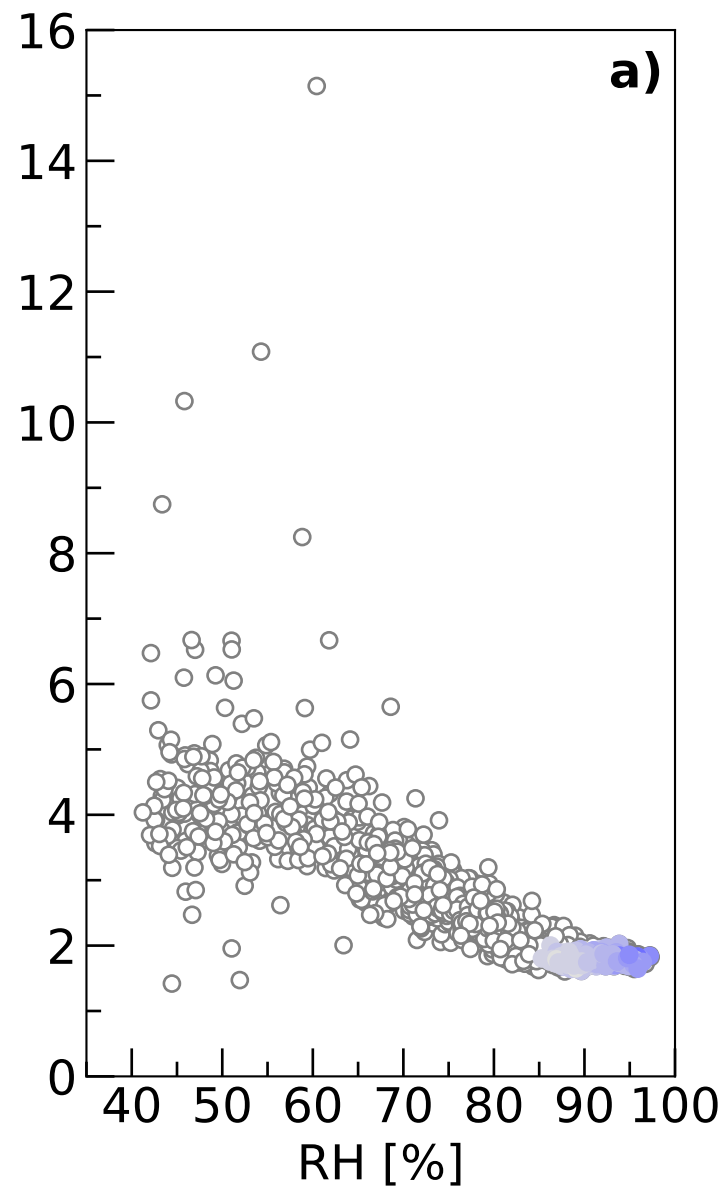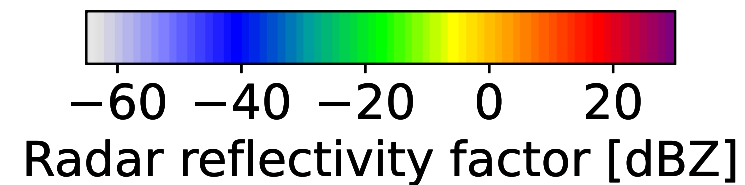

Particle Backscatter  
at 532nm

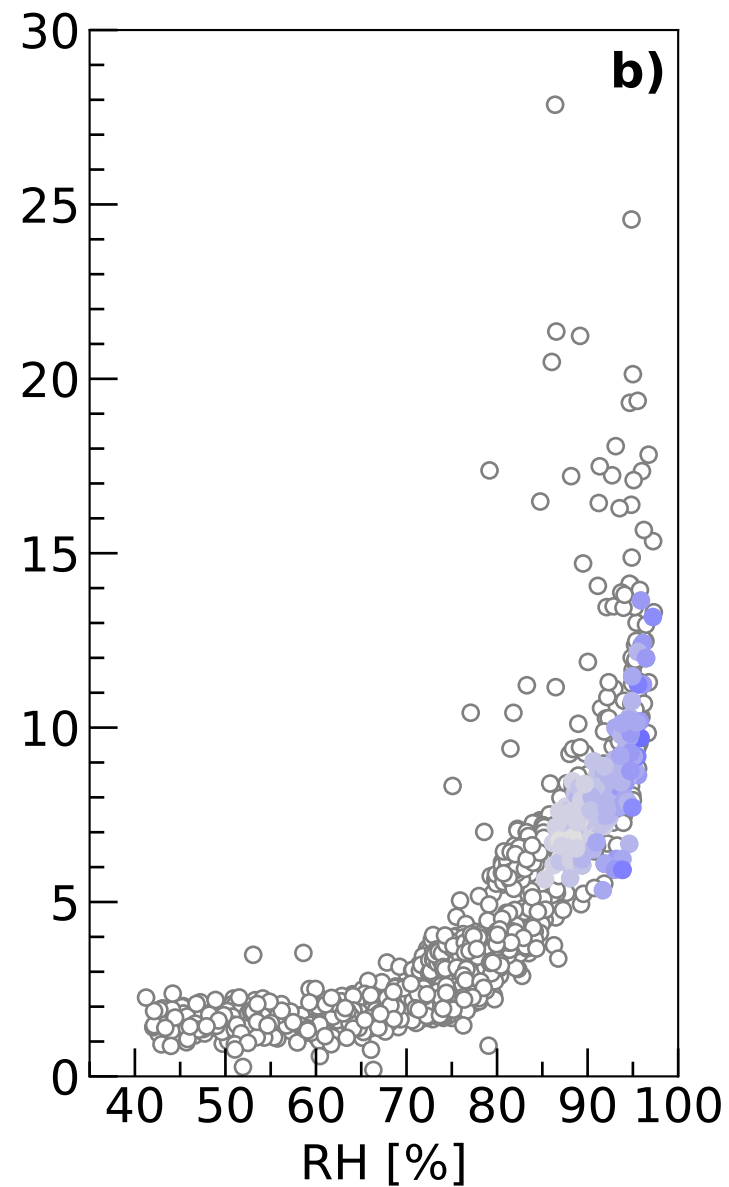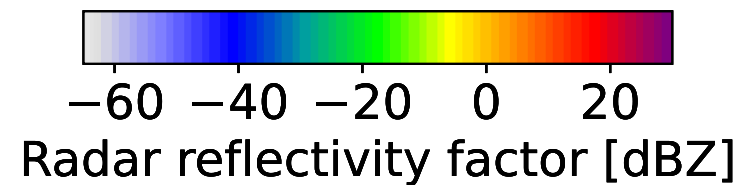

Particle Backscatter  
at 355nm

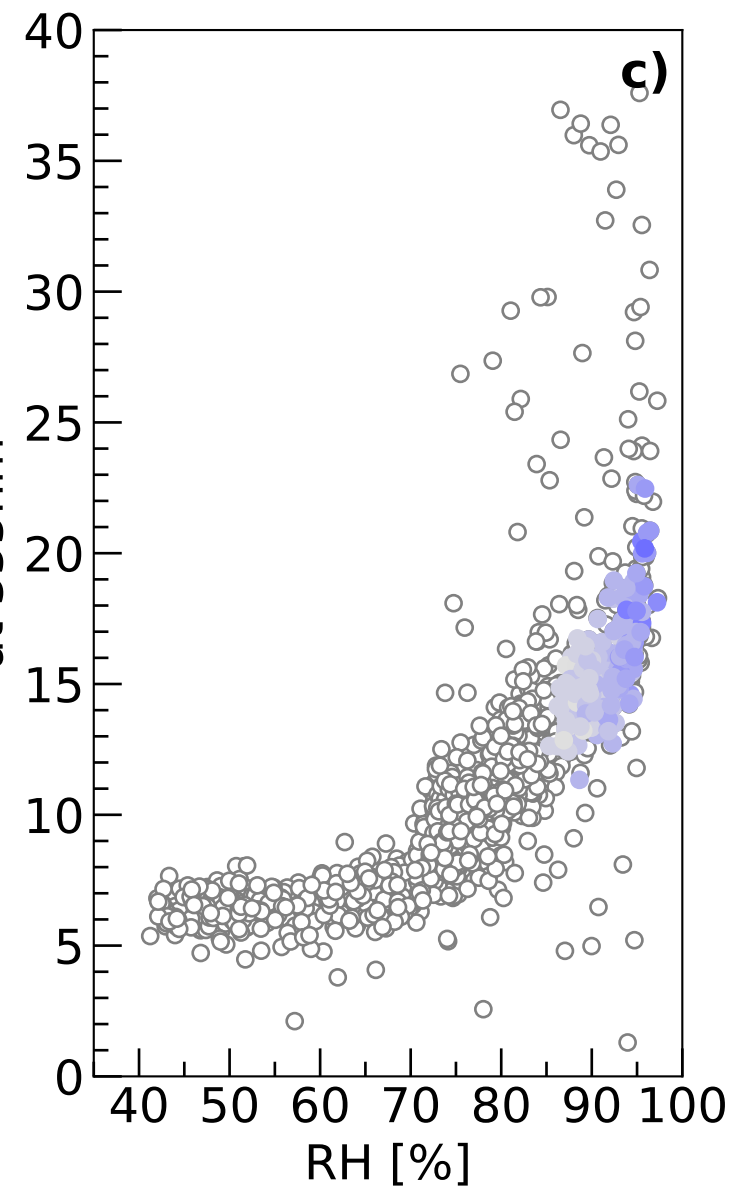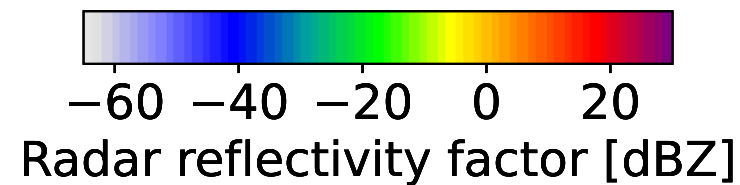

Backscatter  
Ångström coefficient

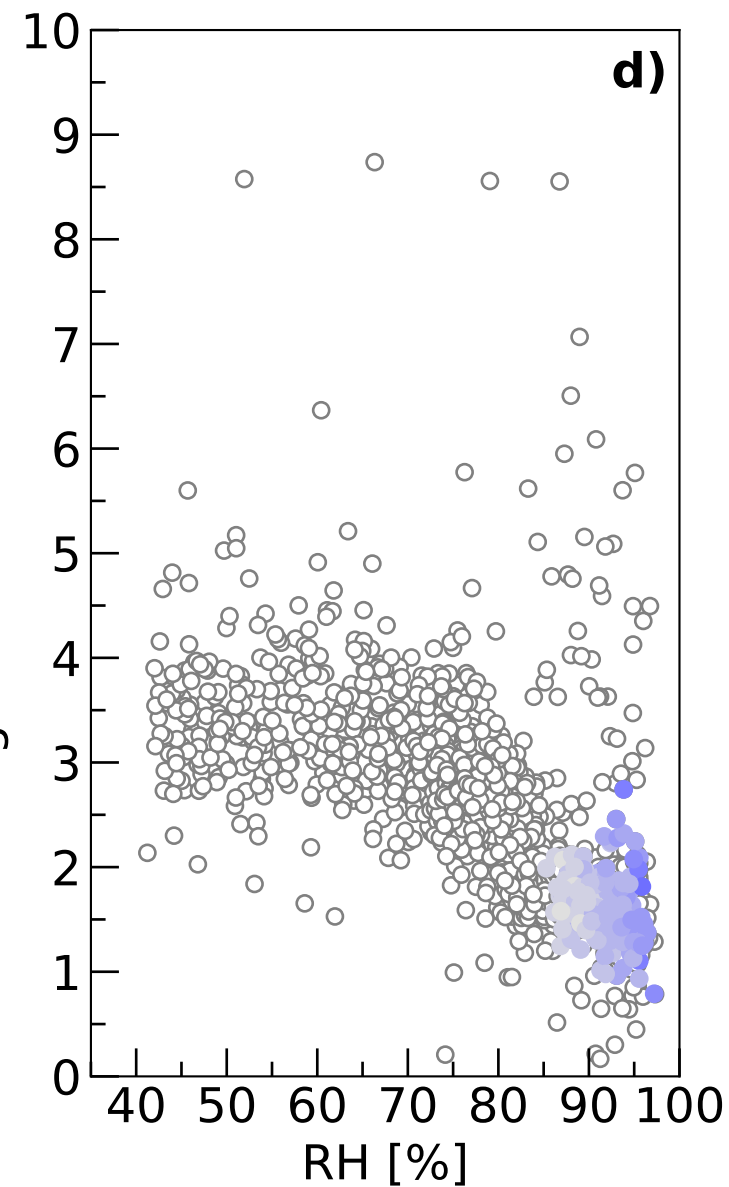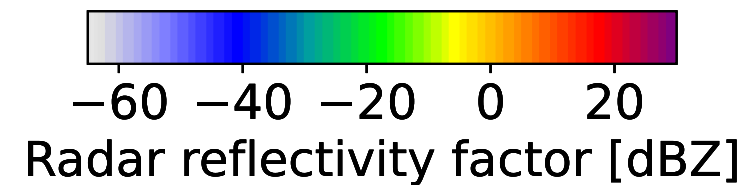

Supplement: Supplementary file [file egusphere-2024-894-AC1-supplement.zip]
